# Supplementary material for: LncRNA PTPRE-AS1 modulates M2 macrophage activation and inflammatory diseases by epigenetic promotion of PTPRE
Source: PubMed Central journal article supplement — Sci Adv. 2019 Dec 11;5(12):eaax9230. doi: 10.1126/sciadv.aax9230 (PMC6905863; doi:10.1126/sciadv.aax9230), 2019-12-11
Supplement: aax9230_SM.pdf [file aax9230_SM.pdf]

## Supplementary Materials for

### **LncRNA *PTPRE-AS1* modulates M2 macrophage activation and inflammatory diseases by epigenetic promotion of *PTPRE***

Xiao Han, Saihua Huang, Ping Xue, Jinrong Fu, Lijuan Liu, Caiyan Zhang, Lan Yang, Li Xia, Licheng Sun, Shau-Ku Huang, Yufeng Zhou\*

\*Corresponding author. Email: yfzhou1@fudan.edu.cn

Published 11 December 2019, *Sci. Adv.* **5**, eaax9230 (2019)  
DOI: 10.1126/sciadv.aax9230

#### **This PDF file includes:**

- Fig. S1. Differentially expressed lncRNAs in LPS- and IL-4–stimulated BMDMs.
- Fig. S2. *PTPRE-AS1* mediates *PTPRE* expression.
- Fig. S3. Neither *PTPRE-AS1* nor *PTPRE* influences IL-4–induced STAT6 phosphorylation levels.
- Fig. S4. Generation of *PTPRE-AS1* KO mice.
- Fig. S5. *PTPRE-AS1* and *PTPRE* are reduced in both DSS-induced colitis and CRE-induced allergic asthma.
- Fig. S6. *PTPRE-AS1* inhibits the expression of M2 macrophage–associated genes in THP1 macrophages.
- Fig. S7. *PTPRE-AS1* deficiency promotes the proliferation and expansion of lung resident macrophages stimulated by IL-4.
- Table S1. Demographic and respiratory health characteristics of patients with allergic asthmatic and healthy controls.
- Table S2. The primer sequences.
- Table S3. The sequences of *PTPRE-AS1* ASO, shRNA, *PTPRE* siRNA, and *WDR5* siRNA.

## Supplementary Results

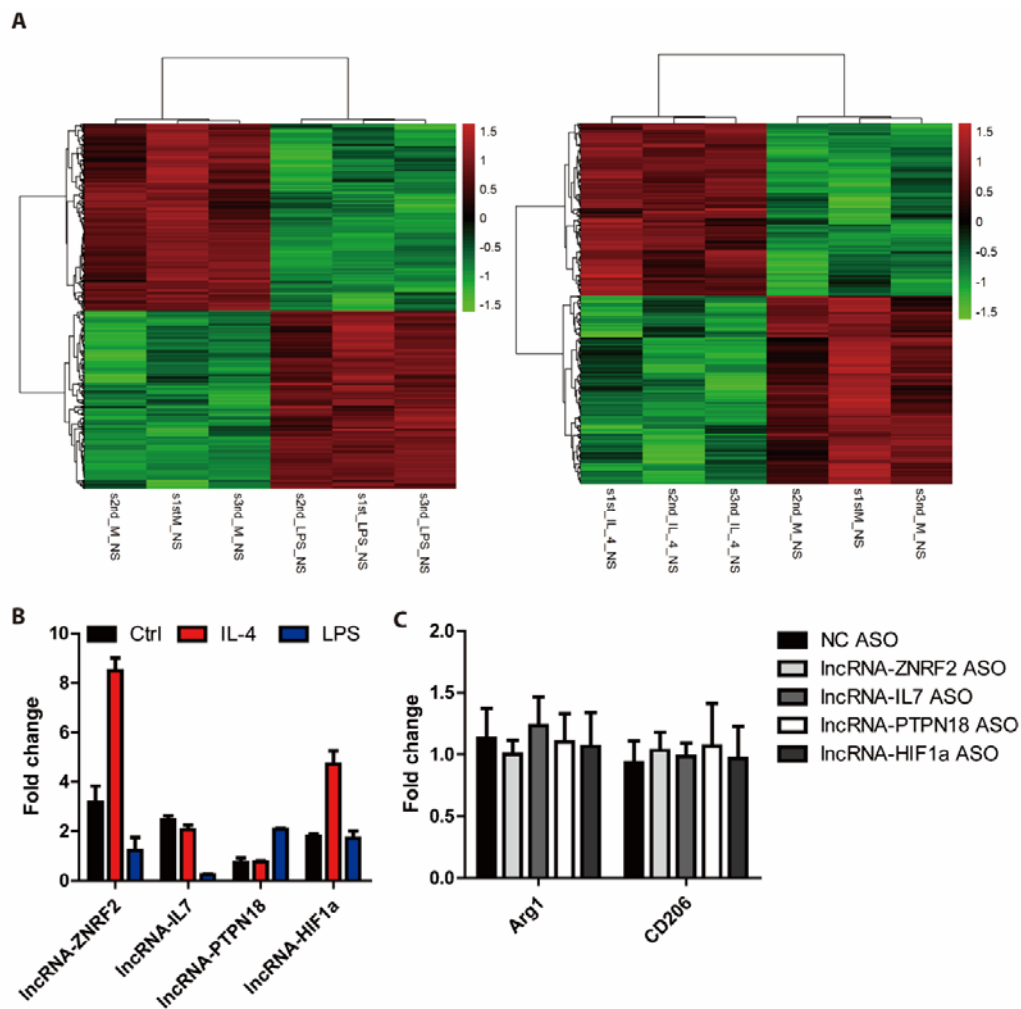

**Fig. S1. Differentially expressed lncRNAs in LPS- and IL-4-stimulated BMDMs.**

(A) Heatmap of lncRNAs with significantly changed levels upon LPS (200 ng/ml, 3 h) and IL-4 (20 ng/ml, 24 h) stimulation of BMDMs. (B) The 5 candidate differentially expressed antisense lncRNAs in BMDMs that were identified by microarray analysis were validated by RT-qPCR. (C) M2-associated gene expression levels in RAW 264.7 cells transfected with lncRNAs ASO after IL-4 treatment were quantified by q-PCR.

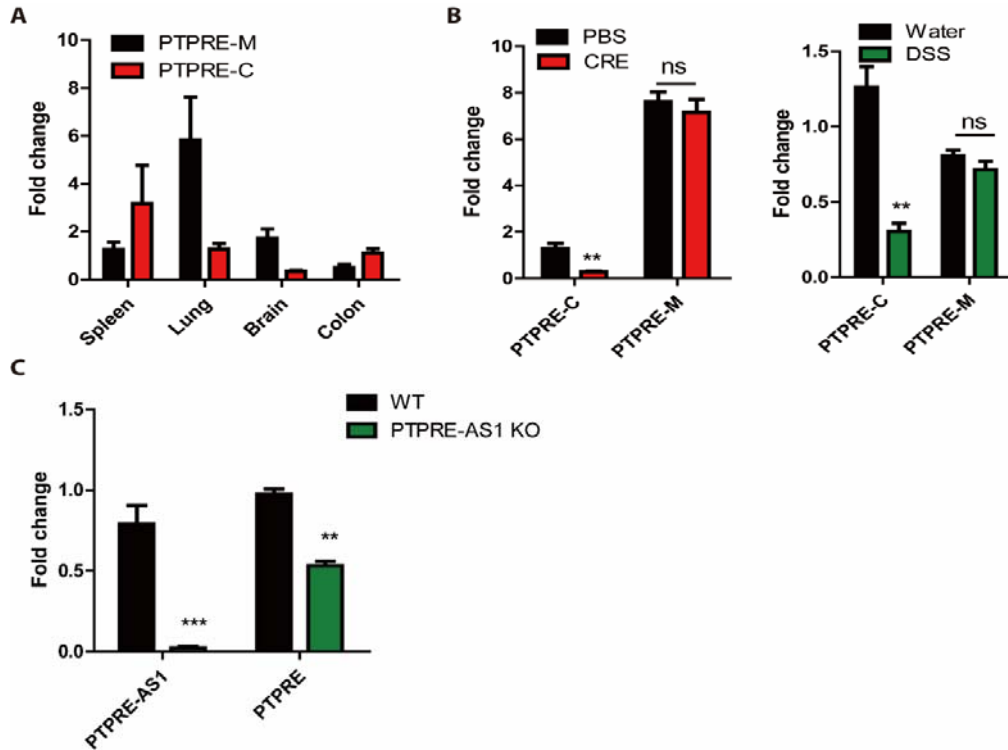

**Fig. S2. *PTPRE-AS1* mediates *PTPRE* expression.** (A) Distribution of two variant *PTPRE* forms, *PTPRE-M* and *PTPRE-C*, in mouse tissues. (B) RT-qPCR analysis of *PTPRE-M* and *PTPRE-C* levels in lung tissues from CRE-induced allergic asthma and colon tissues from DSS-induced colitis, respectively. (C) RT-qPCR analysis of *PTPRE-AS1* and *PTPRE* levels in BMDMs from WT and *PTPRE-AS1*-deficient mice. Data are presented as means  $\pm$  SEM from three independent experiments. \*\* $P < 0.01$ ; \*\*\* $P < 0.001$ ; ns, no significance.

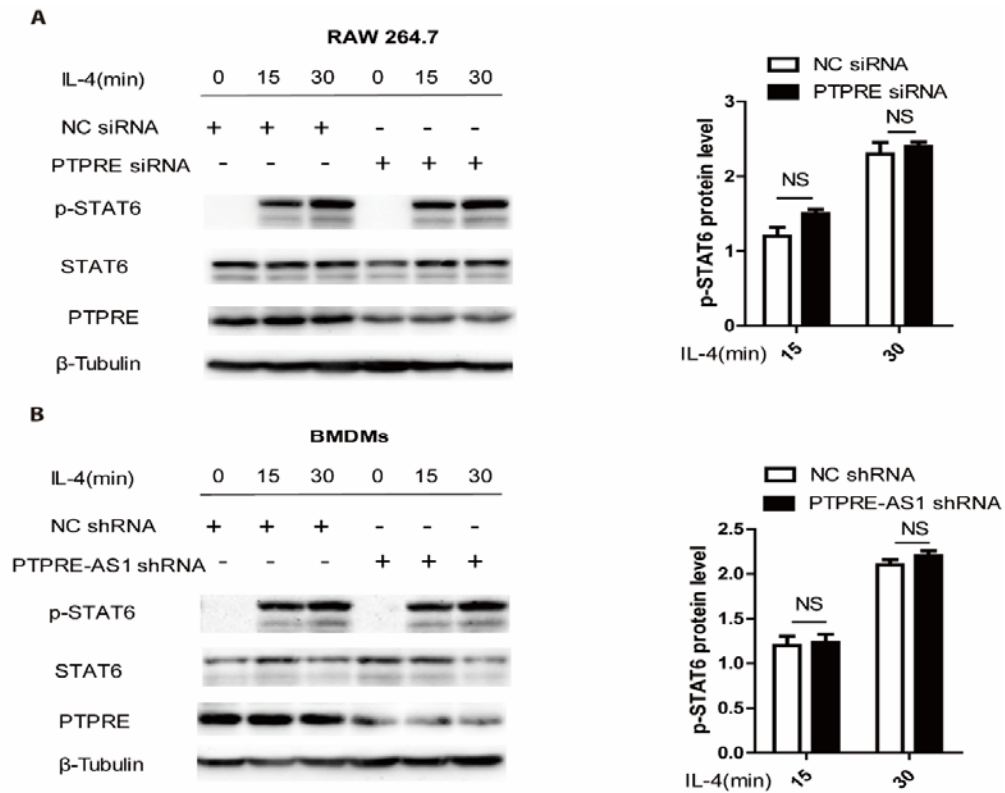

**Fig. S3. Neither *PTPRE-AS1* nor *PTPRE* influences IL-4-induced STAT6 phosphorylation levels.** (A) RAW 264.7 cells were transfected with *PTPRE* or control siRNA. (B) BMDMs were transfected with *PTPRE-AS1* or control shRNA, followed by IL-4 stimulation. Levels of STAT6 phosphorylation (p-STAT6), total STAT6, and PTPRE were examined by western blotting. p-STAT6 protein levels were normalized against those of  $\beta$ -Tubulin and quantified with ImageJ software. NS, no significance. Data are presented as one of three independent experiments.

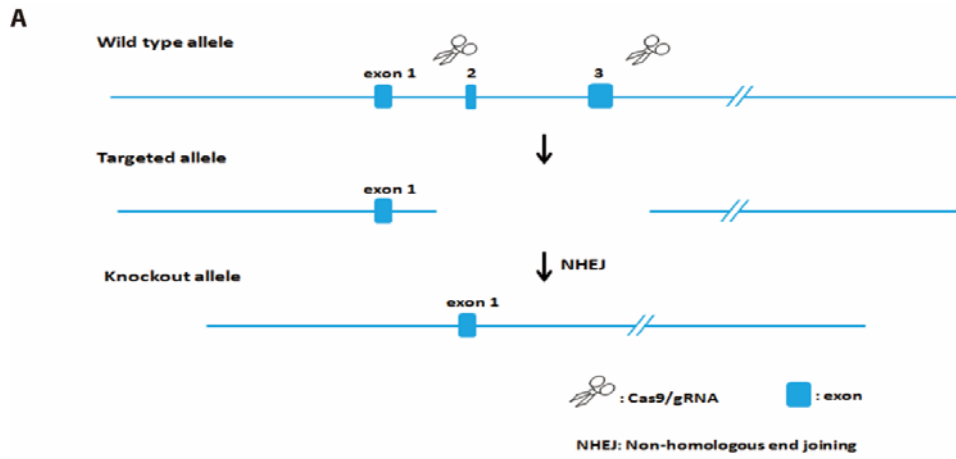

**B**

| gRNA  | Sequence(5'-3')            |
|-------|----------------------------|
| gRNA1 | CTACCCTTGACCGTGCCTT<br>TGG |
| gRNA2 | ACACCAAAGGCAGGTGCAA<br>GGG |

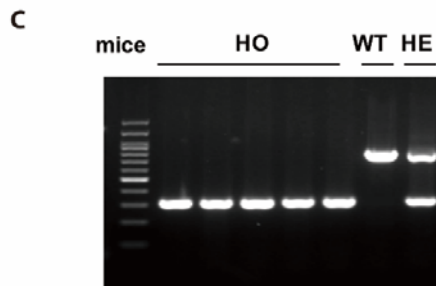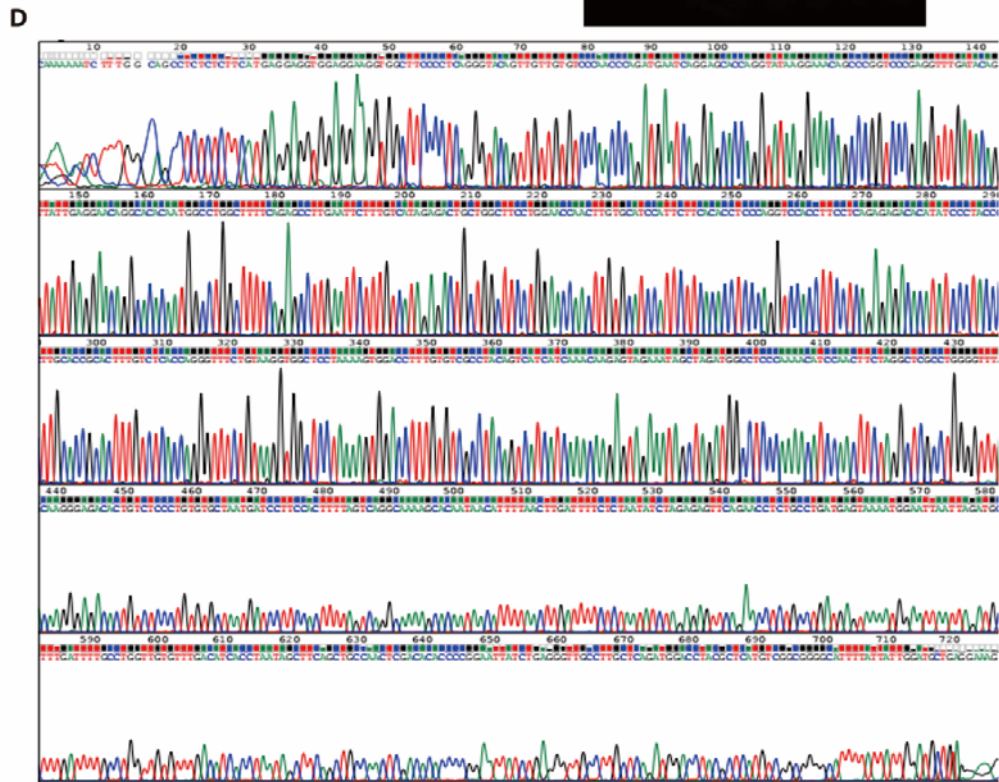

**Fig. S4. Generation of *PTPRE-ASI* KO mice.** (A) Schematic of the targeting strategy for *PTPRE-ASI* disruption using CRISPR/Cas9 technology. (B) The guide RNA sequences used in this project are shown. (C) Gel image of PCR products amplified using genotyping primers to identify homozygote (HO), WT, and heterozygote (HE) mice. (D) *PTPRE-ASI*-null mouse genotypes were confirmed by DNA sequencing.

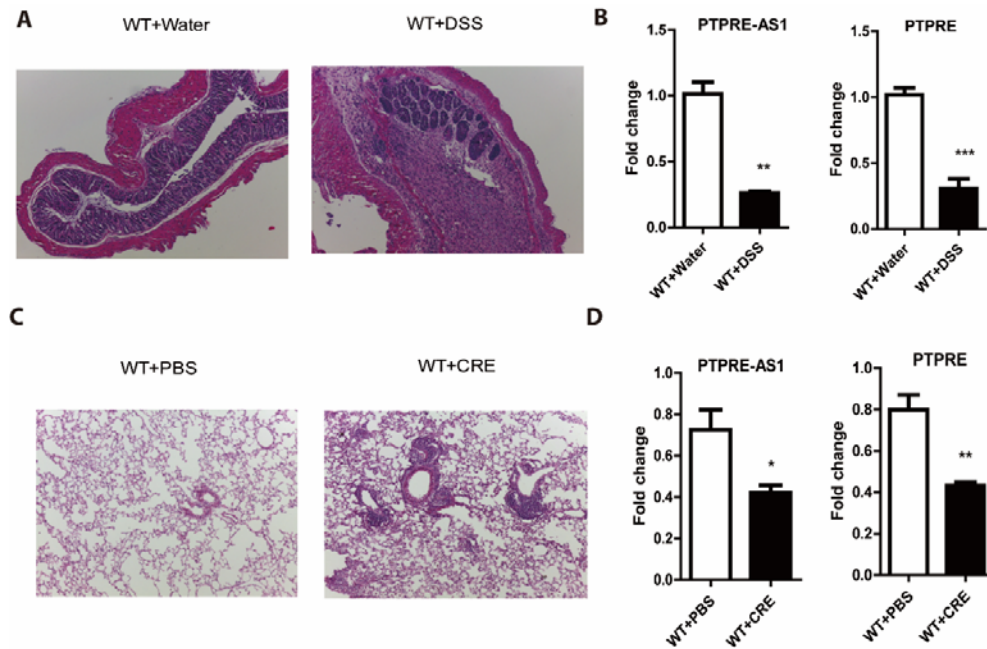

**Fig. S5. *PTPRE-AS1* and *PTPRE* are reduced in both DSS-induced colitis and CRE-induced allergic asthma.** (A) In DSS-induced colitis models, representative images of the histopathological changes in colon tissue examined by H&E staining (magnification,  $\times 100$ ). (B) Levels of *PTPRE-AS1* and *PTPRE* in colon tissues were determined by RT-qPCR. (C) In CRE-induced allergic asthma, representative images of H&E staining of lung tissues from PBS- and CRE-challenged WT mice (magnification,  $\times 100$ ). (D) Levels of *PTPRE-AS1* and *PTPRE* in lung tissue samples were determined by RT-qPCR. The data shown are from one of two independent experiments. Data are presented as means  $\pm$  SEM. \* $P < 0.05$ ; \*\* $P < 0.01$ ; \*\*\* $P < 0.001$ .

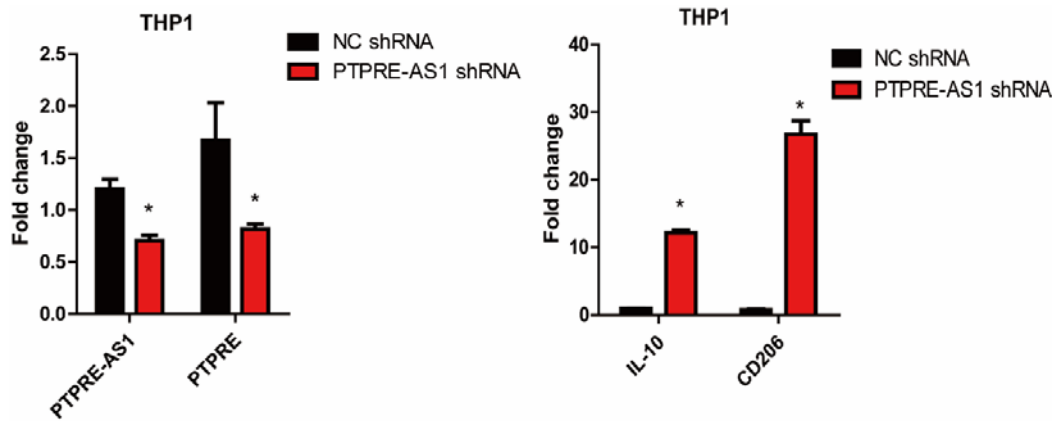

**Fig. S6. *PTPRE-AS1* inhibits the expression of M2 macrophage-associated genes in THP1 macrophages.** Macrophages were induced using THP1 cells treated with PMA (500 ng/ml). Knockdown of *PTPRE-AS1* in THP1 macrophages using *PTPRE-AS1* or control shRNA. After transfection (72 h), levels of *PTPRE-AS1*, *PTPRE* and M2-associated genes in IL-4-stimulated (20 ng/ml, 24 h) THP1 macrophages were quantified by RT-qPCR analysis. Experiments showing identical results were performed at least twice. \* $P < 0.05$ .



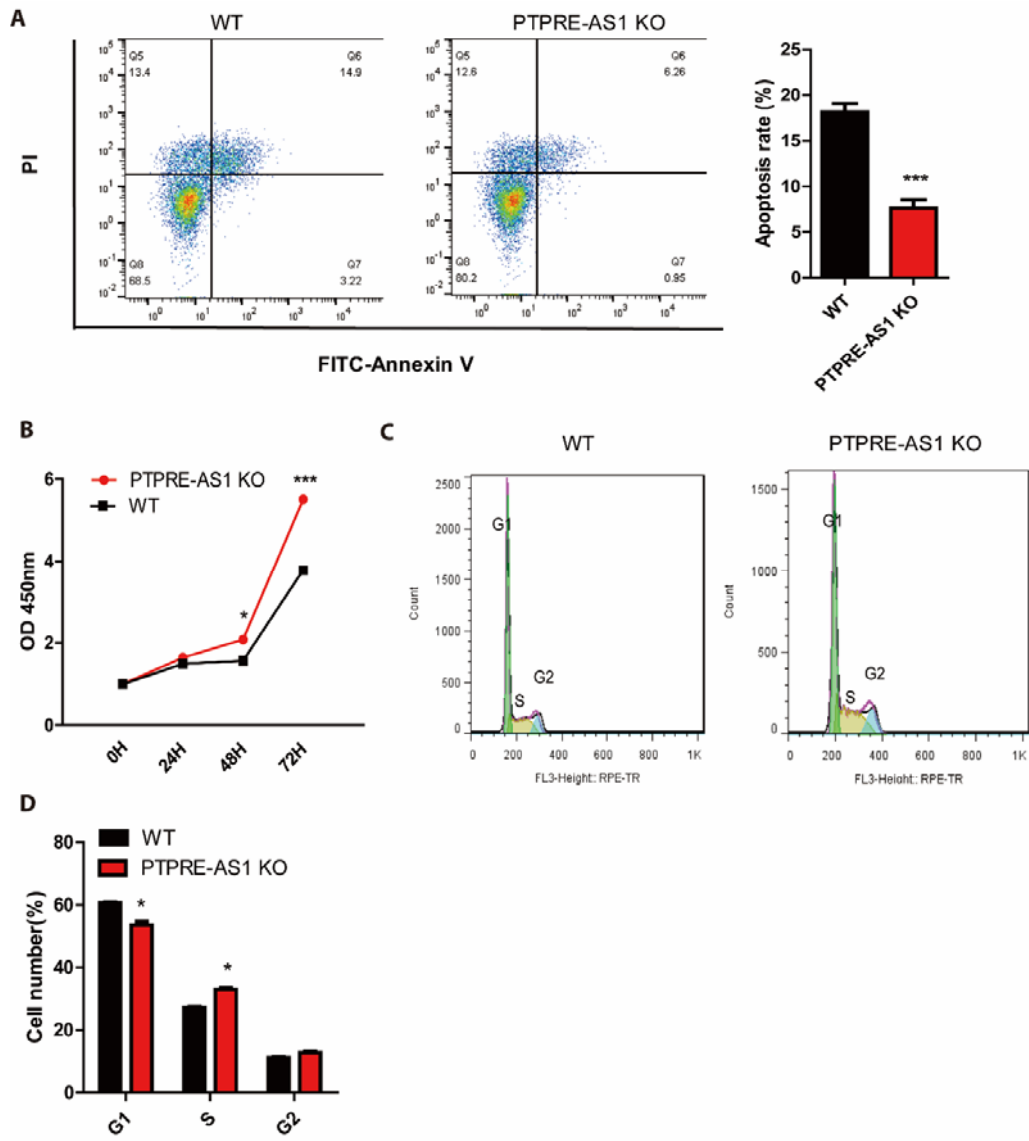

**Fig. S7. *PTPRE-AS1* deficiency promotes the proliferation and expansion of lung resident macrophages stimulated by IL-4.** (A) Flow cytometry was used to measure the apoptosis rate of lung macrophages from WT and *PTPRE-AS1* deficient mice after IL-4 stimulation for 24 h. Quantification of apoptotic cells were analyzed. (B) CCK-8 assays were performed to determine the proliferation of lung macrophages from WT and *PTPRE-AS1* deficient mice after IL-4 stimulation. (C) (D) The cell cycle status of WT and *PTPRE-AS* KO lung macrophages after IL-4 treatment was measured by PI analysis. The percentages of total cells in each gate (G1, S, G2) are displayed. Data are presented as mean  $\pm$  SEM. \* $P < 0.05$ ; \*\*\* $P < 0.001$ .

**Table S1. Demographic and respiratory health characteristics of patients with allergic asthmatic and healthy controls.**

| <b>Characteristic</b>                   | <b>Normal (N=42)</b> | <b>Asthma(N=40)</b> |
|-----------------------------------------|----------------------|---------------------|
| <b>Male/Female, no.</b>                 | 34/8                 | 32/8                |
| <b>Age, years</b>                       | 9.3 ± 3.8            | 8.5 ± 3.9           |
| <b>Asthma duration, month</b>           | N/A                  | 6.12 ± 6.6          |
| <b>Blood eos<sup>1</sup> (cells/uL)</b> | Not done             | 368.5 ± 237.03      |
| <b>Total IgE (ku/L)</b>                 | Not done             | 165.3 ± 114.3       |
| <b>ACQ score <sup>2</sup></b>           | Not done             | 0.95 ± 0.6          |

Values are presented as mean ±SEM. <sup>1</sup> eos, eosinophil. <sup>2</sup> ACQ, Asthma Control Questionnaire

**Table S2. The primer sequences.**

**Identification of PTPRE-AS1 KO mice**

| <b>genes</b>        | <b>Forward primer(5'-3')</b> | <b>Reverse primer(5'-3')</b> |
|---------------------|------------------------------|------------------------------|
| <b>PTPRE-AS1 KO</b> | ACCCCCAGCCTCCAGCAC<br>ACT    | GGGGCCTCCTACAGCA<br>TCCAATAA |

**Mouse qPCR analysis**

| <b>genes</b>                     | <b>Forward primer(5'-3')</b> | <b>Reverse primer(5'-3')</b> |
|----------------------------------|------------------------------|------------------------------|
| <b>GAPDH</b>                     | CAGAACATCATCCCTGCA<br>TC     | GCAGAGCCCTTTTTGA<br>TAATGT   |
| <b>LncRNA-PTPRE<br/>variant1</b> | TTGAGAGGGGTGAAAGT<br>TGAAC   | CCCAGTGAACGAACAT<br>CACCAT   |
| <b>PTPRE-AS1</b>                 | CAGTGAATGAGTGTGGCT<br>CCTG   | ACATGTAGAGTGTCCC<br>TCGTTG   |
| <b>LncRNA-PTPRE<br/>variant3</b> | CTGGGGACACTCCTACCT<br>GAAG   | ACAGGAGCCACACTCA<br>TTCACT   |
| <b>PTPRE-M</b>                   | ATGGAGCCCTTGTGTCCA<br>CTCCT  | TGAAGTGAGCTGTGAG<br>ACC      |
| <b>PTPRE-C</b>                   | G TTCCTGAAGAAAGTGA<br>AGAC   | TCCCATAGAGGTAGT<br>ATCC      |
| <b>WDR5</b>                      | CTCCTTGTGTCTGCCTCT<br>GATG   | CCTGAGACGATGAGGT<br>TGGACT   |
| <b>IL-10</b>                     | CGGGAAGACAATAACTG<br>CACCC   | CGGTTAGCAGTATGTT<br>GTCCAGC  |
| <b>Arg-1</b>                     | CATTGGCTTGCGAGACGT<br>AGAC   | GCTGAAGGTCTCTTCC<br>ATCACC   |
| <b>CD206</b>                     | G TTCACCTGGAGTGATGG<br>TTCTC | AGGACATGCCAGGGTC<br>ACCTTT   |

|               |                              |                                |
|---------------|------------------------------|--------------------------------|
| <b>Fizz1</b>  | CAAGGAACTTCTTGCCAA<br>TCCAG  | CCAAGATCCACAGGCA<br>AAGCCA     |
| <b>Ym1</b>    | TACTCACTTCCACAGGAG<br>CAGG   | CTCCAGTGTAGCCATC<br>CTTAGG     |
| <b>MALAT1</b> | CATGGCGGAATTGCTGGT<br>A      | CGTGCCAACAGCATAG<br>CAGTA      |
| <b>NEAT1</b>  | GCTGGACCTTTCATGTAA<br>CGGG   | TGAACTCTGCCGGTAC<br>AGGGAA     |
| <b>U1</b>     | GGGAGATACCATGATCAC<br>GAAGGT | CCACAAATTATGCAGT<br>CGAGTTTCCC |

#### Human qPCR analysis

| <b>genes</b>     | <b>Forward primer(5'-3')</b> | <b>Reverse primer(5'-3')</b> |
|------------------|------------------------------|------------------------------|
| <b>ACTIN</b>     | CACCATTGGCAATGAGCG<br>GTTC   | AGGTCTTTGCCGATGT<br>CCACGT   |
| <b>PTPRE-AS1</b> | TCTAACCGCACGTACACC<br>AG     | GGAGCTGACACTTGTG<br>TGTTG    |
| <b>PTPRE</b>     | TGATTGACCTCATCGCAG<br>CCGT   | CTCGCTCCAAAATGTT<br>GCTGAGG  |
| <b>WDR5</b>      | AGTGCCTCAAGACTTTGC<br>CAGC   | CGATGAGCGTCTTCAG<br>GCACTG   |
| <b>IL-10</b>     | TCTCCGAGATGCCTTCAG<br>CAGA   | TCAGACAAGGCTTGGC<br>AACCCA   |
| <b>Arg-1</b>     | TCATCTGGGTGGATGCTC<br>ACAC   | GAGAATCCTGGCACAT<br>CGGGAA   |
| <b>CD206</b>     | AGCCAACACCAGCTCCTC<br>AAGA   | CAAAACGCTCGCGCAT<br>TGTCCA   |

### CHIP-qPCR analysis

| genes                  | Forward primer(5'-3')        | Reverse primer(5'-3')        |
|------------------------|------------------------------|------------------------------|
| <b>PTPRE promoter1</b> | CATGCTTATCTGTGGCCA<br>AAGGTG | CTCCTCGAGGCTGGAG<br>AATGTATT |
| <b>PTPRE promoter2</b> | CCTTAAGTGGAAAGTCAC<br>TGGGGT | CTGTGCTATGCTGACTT<br>ACTCTGG |
| <b>PTPRE promoter3</b> | GATAGGAGGGCACCCTAA<br>TAGGTT | TCCACCTTCCTCAGAG<br>AGACACAT |
| <b>PTPRE promoter4</b> | GAGAGAGTGTGTGAGAG<br>AGAGAGC | TTCAGTTCTTTCCAGG<br>GGACAGAG |

**Table S3. The sequences of PTPRE-AS1 ASO, shRNA, PTPRE siRNA, and WDR5 siRNA.**

| GENES                   | Sense (5'-3')             | Antisense(5'-3')          |
|-------------------------|---------------------------|---------------------------|
| <b>NC ASO</b>           | TCTACTCGTCGCTAC<br>GTACC  |                           |
| <b>PTPRE-AS1 ASO1</b>   | TGTCTGTTGCAGATT<br>GGTGC  |                           |
| <b>PTPRE-AS1 ASO2</b>   | CCTTTTCTCTTCCTCT<br>TCCT  |                           |
| <b>NC shRNA</b>         | TTCTCCGAACGTGTC<br>ACGT   |                           |
| <b>PTPRE-AS1 shRNA1</b> | GGCACACACAAGAT<br>GTGTTAG |                           |
| <b>PTPRE-AS1 shRNA2</b> | GCACCAATCTGCAAC<br>AGACAG |                           |
| <b>NC siRNA</b>         | UUCUCCGAACGUGU<br>CACGUTT | ACGUGACACGUUCGGAGAAT<br>T |

---

|                     |                            |                            |
|---------------------|----------------------------|----------------------------|
| <b>PTPRE siRNA1</b> | GGAUGCUC AAGUUC<br>CUGAATT | UUCAGGAACUUGAGCAUCCT<br>T  |
| <b>PTPRE siRNA2</b> | CCAGACGGAUGUUC<br>AGUAUTT  | AUACUGAACAUCCGUCUGGT<br>T  |
| <b>WDR5 siRNA1</b>  | CCUGGUGUAUAUCU<br>GGAAUTT  | AUUC CAGAUAUACACCAGGT<br>T |
| <b>WDR5 siRNA2</b>  | CACCAGUUAAGCCA<br>AACUATT  | UAGUUUGGCUU AACUGGUGT<br>T |

---
